# Supplementary material
Source: Elsevier journal article supplement (https://www.sciencedirect.com/science/article/pii/S2238785418305039)
Supplement: mmc1 [file S2238785418305039:mmc1.docx]

**Supporting information:** “Zn-Al-based layered double hydroxides (LDH) active structures for dental restorative materials’

Marcela Piassi Bernardo, Caue Ribeiro

Mechanical properties of the commercial dental resin added with 33.10-[Zn-Al]c600 and 33.10-[Zn-Al]c300 at mass ratios of 2.5% and 4%.

*Table S1*: Mechanical properties of dental resin reinforced with 33.10-[Zn-Al]-LDHc.

| Sample | Flexural strength (MPa) | Elastic modulus  (GPa) |
| --- | --- | --- |
| Control | 459.6 | 25.04 |
| 2.5% 33.10-[Zn-Al]c300 | 681.2 | 22.97 |
| 4% 33.10-[Zn-Al]c300 | 104.2 | 05.60 |
| 2.5% 33.10-[Zn-Al]c600 | 111.4 | 05.18 |
| 4% 33.10-[Zn-Al]c600 | 255.7 | 11.16 |

Data obtained from a three-point flexural test with a span of 40 mm was used to fracture the specimens, using a computer-controlled universal mechanical testing machine (Instron Corp., Canton, MA) fitted with a 50 kgf load cell and operated at a crosshead speed of 0.5 mm min-1.
